# Supplementary material for: The Relationship between Serum miRNAs and Early Mortality in Multiple Myeloma Patients Treated with Bortezomib-Based Regimens
Source: MDPI journal article supplement (doi:10.3390/ijms24032938), 2023-02-02
Supplement: s1 [file s1]

| miRBase ID                                       | GeneGlobe ID | Mature miRNA sequence   |
|--------------------------------------------------|--------------|-------------------------|
| miRNAs used for data normalization               |              |                         |
| hsa-miR-152-3p                                   | YP00204294   | UCAGUGCAUGACAGAACUUGG   |
| hsa-miR-23b-3p                                   | YP02119314   | AUCACAUUGCCAGGGAUUACCAC |
| selected miRNAs used for the expression analysis |              |                         |
| hsa-miR-122-5p                                   | YP00205664   | UGGAGUGUGACAAUGGUGUUUG  |
| hsa-miR-1224-3p                                  | YP00204045   | CCCCACCUCUCUCUCCUCAG    |
| hsa-miR-143-3p                                   | YP00205992   | UGAGAUGAAGCACUGUAGCUC   |
| hsa-miR-148a-3p                                  | YP00205867   | UCAGUGCACUACAGAACUUUGU  |
| hsa-miR-151a-3p                                  | YP00204576   | CUAGACUGAAGCUCCUUGAGG   |
| hsa-miR-151a-5p                                  | YP00204007   | UCGAGGAGCUCACAGUCUAGU   |
| hsa-miR-16-2-3p                                  | YP00204309   | CCAAUAUUACUGUGCUGCUUUA  |
| hsa-miR-16-5p                                    | YP00205702   | UAGCAGCACGUAAAUAUUGGCG  |
| hsa-miR-181a-5p                                  | YP00206081   | AACAUUCAACGCUGUCGGUGAGU |
| hsa-miR-191-5p                                   | YP00204306   | CAACGGAAUCCCAAAGCAGCUG  |
| hsa-miR-199a-5p                                  | YP00204494   | CCCAGUGUUCAGACUACCUGUUC |
| hsa-miR-19b-3p                                   | YP00204450   | UGUGCAAAUCCAUGCAAAACUGA |
| hsa-miR-215-5p                                   | YP00204598   | AUGACCUAUGAAUUGACAGAC   |
| hsa-miR-22-5p                                    | YP00204255   | AGUUCUUCAGUGGCAAGCUUUA  |
| hsa-miR-223-3p                                   | YP00205986   | UGUCAGUUUGUCAAAUACCCCA  |
| hsa-miR-29a-3p                                   | YP00204698   | UAGCACCAUCUGAAAUCGGUUA  |
| hsa-miR-29b-3p                                   | YP00204679   | UAGCACCAUUUGAAAUCAGUGUU |
| hsa-miR-30e-5p                                   | YP00204714   | UGUAAACAUCCUUGACUGGAAG  |
| hsa-miR-326                                      | YP00204512   | CCUCUGGGCCCUUCCUCCAG    |
| hsa-miR-328-3p                                   | YP00204364   | CUGGCCUCUCUGCCCUUCCGU   |
| hsa-miR-33a-5p                                   | YP00205690   | GUGCAUUGUAGUUGCAUUGCA   |
| hsa-miR-376a-3p                                  | YP00204508   | AUCAUAGAGGAAAAUCCACGU   |
| hsa-miR-376c-3p                                  | YP00204442   | AACAUAGAGGAAAUUCCACGU   |
| hsa-miR-409-3p                                   | YP00204358   | GAAUGUUGCUCGGUGAACCCCU  |
| hsa-miR-424-5p                                   | YP00204736   | CAGCAGCAAUUCAUGUUUUGAA  |
| hsa-miR-502-3p                                   | YP00204043   | AAUGCACCUGGGCAAGGAUUCA  |
| hsa-miR-627-5p                                   | YP00205979   | GUGAGUCUCUAAGAAAAGAGGA  |
| hsa-miR-744-5p                                   | YP00204663   | UGC GGGGCUAGGGCUAACAGCA |
| hsa-miR-766-3p                                   | YP00204499   | ACUCCAGCCCCACAGCCUCAGC  |
